# Supplementary material for: Manganese porphyrin/ICG nanoparticles as magnetic resonance/fluorescent dual-mode probes for imaging of sentinel lymph node metastasis
Source: Royal Society of Chemistry journal article supplement (doi:10.1039/d2tb01885c), 2022-01-01
Supplement: d2tb01885c1.pdf [file d2tb01885c1.pdf]

## Supporting information

### Manganese porphyrin/ICG nanoparticles as magnetic resonance/fluorescence dual-mode probes for imaging of sentinel lymph node metastasis

Xiaomin Fu<sup>a</sup>, Shengxiang Fu<sup>a</sup>, Zhongyuan Cai<sup>a</sup>, Rongrong Jin<sup>a</sup>, Chunchao Xia<sup>b</sup>, Su  
Lv<sup>b</sup>, Bing Song<sup>cd</sup>, Qiyong Gong<sup>b</sup> and Hua Ai<sup>a,b\*</sup>

<sup>a</sup> National Engineering Research Center for Biomaterials, Sichuan University,  
Chengdu, 610064, China

<sup>b</sup> Department of Radiology, West China Hospital, Sichuan University, Chengdu,  
610041, China

<sup>c</sup> Huaxi MR Research Center (HMRRC), Department of Radiology, West China  
Hospital of Sichuan University, Chengdu, 610041, China

<sup>d</sup> Psychoradiology Research Unit of Chinese Academy of Medical Sciences, Sichuan  
University, Chengdu, 610041, China

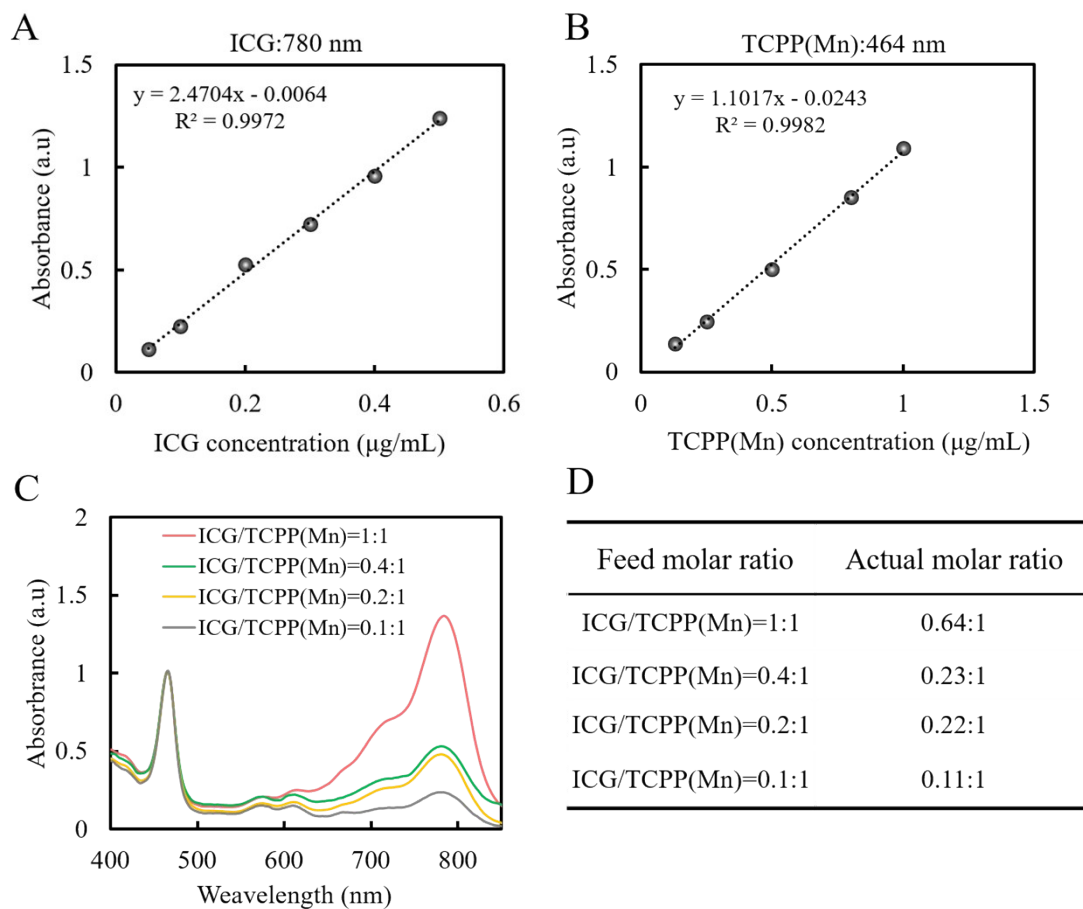

Figure 1. The standard curves of ICG (A) and TCPP(Mn) (B) in DMF solution. (C) The normalized UV-Vis spectrum of F127-ICG/Mn NPs in DMF solution with different molar ratios of ICG/TCPP(Mn) from 0.1:1 to 1:1. (D) Actual molar ratio of ICG/TCPP(Mn) in F127-ICG/Mn NPs.

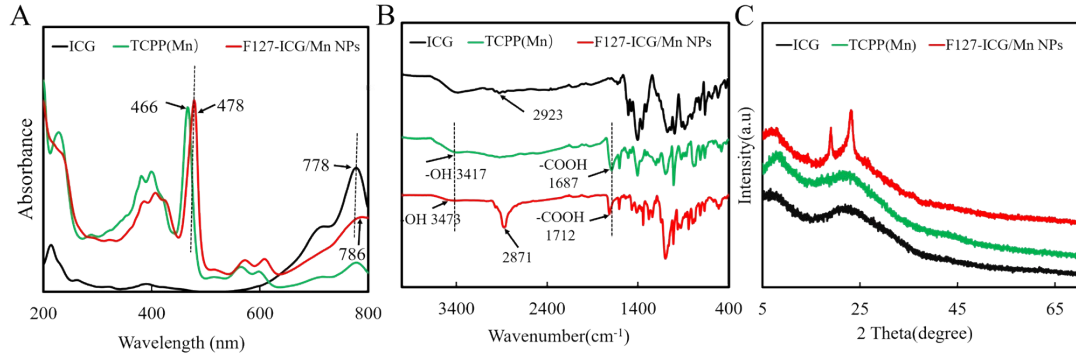

Figure S2. (A) UV-vis spectra, (B) FT-IR spectra and (C) XRD spectra of ICG, TCPP(Mn) and F127-ICG/Mn NPs.

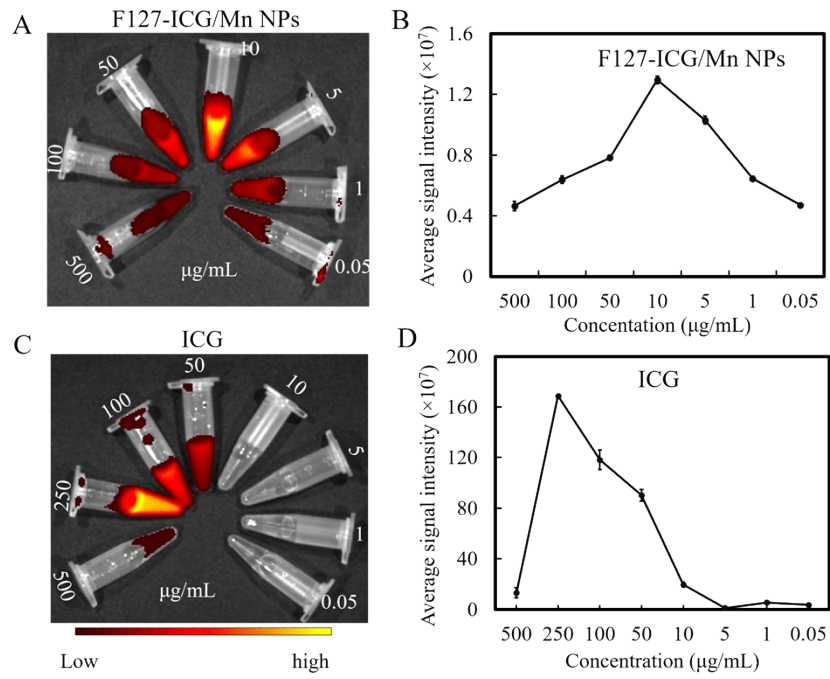

Figure S3. (A)FL imaging pictures (B) and quantitative analysis of F127-ICG/Mn NPs; (C)FL imaging picture (D) and quantitative analysis of ICG.

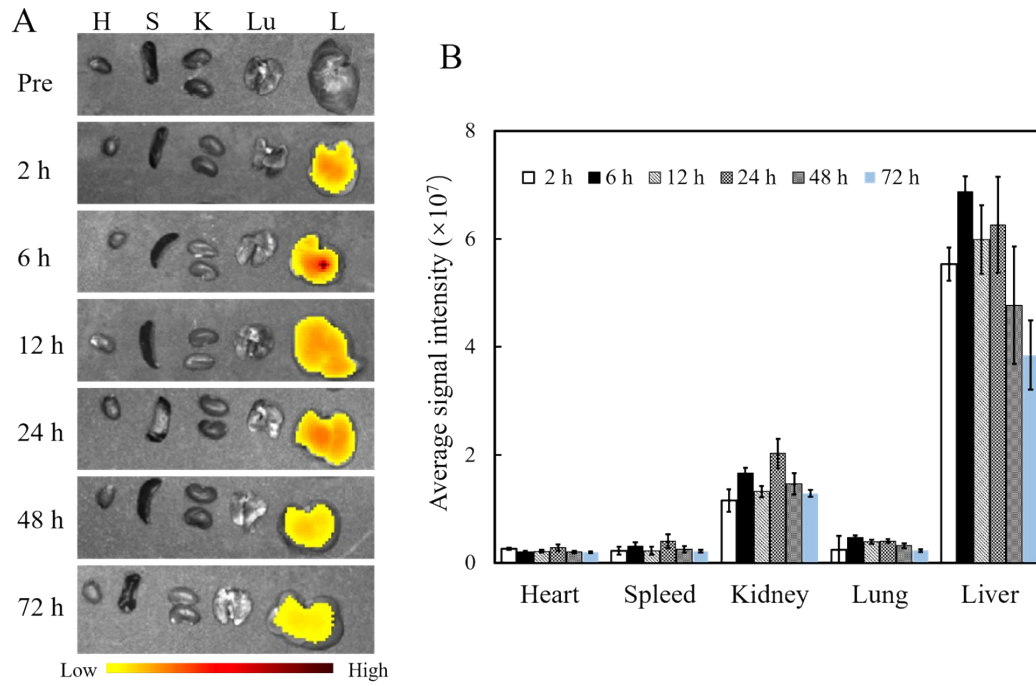

Figure S4. (A) Fluorescence images and (B) quantitative analysis of the isolated major organs of normal BALB/c mice after injection of F127-ICG/Mn NPs at a dose of 250  $\mu\text{g}$  ICG /kg at different time points (2 h, 6 h, 12 h, 24 h, 48 h and 72 h) (n = 3). (H, Heart; S, Spleen; K, Kidney; Lu, lung; L, Liver)

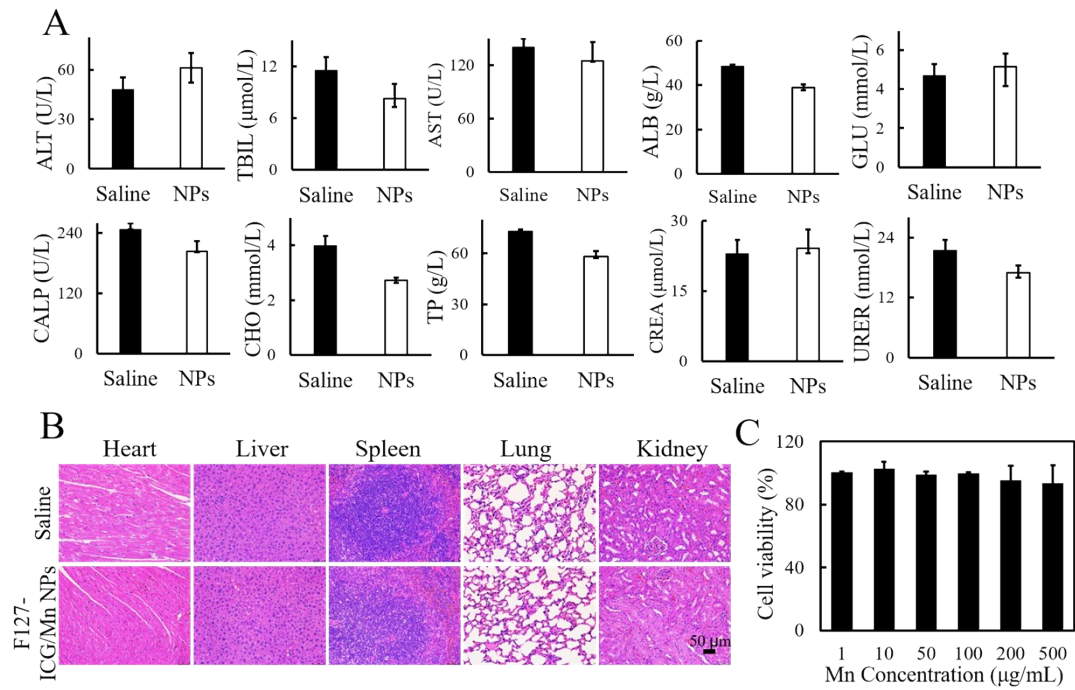

Figure S5. (A) Biochemical indicators and (B) H&E staining of main issues from mice 24 h after administration. (C) Ccell viabilities of Raw264.7 incubated with different concentrations of F127-ICG/Mn NPs for 24 h.
